# Supplementary material
Source: publisher figshare collection journal article supplement (https://acs.figshare.com/ndownloader/files/6452022)
Supplement: Supplementary file 1 [file 6452022]

 
data_43 
 
_audit_creation_method            SHELXL-97 
_chemical_name_systematic 
; 
 ? 
; 
_chemical_name_common             ? 
_chemical_melting_point           ? 
_chemical_formula_moiety          ? 
_chemical_formula_sum 
 'C17 H24 N4 O13 Zn' 
_chemical_formula_weight          557.77 
 
loop_ 
 _atom_type_symbol 
 _atom_type_description 
 _atom_type_scat_dispersion_real 
 _atom_type_scat_dispersion_imag 
 _atom_type_scat_source 
 'C'  'C'   0.0033   0.0016 
 'International Tables Vol C Tables 4.2.6.8 and 6.1.1.4' 
 'H'  'H'   0.0000   0.0000 
 'International Tables Vol C Tables 4.2.6.8 and 6.1.1.4' 
 'N'  'N'   0.0061   0.0033 
 'International Tables Vol C Tables 4.2.6.8 and 6.1.1.4' 
 'O'  'O'   0.0106   0.0060 
 'International Tables Vol C Tables 4.2.6.8 and 6.1.1.4' 
 'Zn'  'Zn'   0.2839   1.4301 
 'International Tables Vol C Tables 4.2.6.8 and 6.1.1.4' 
 
_symmetry_cell_setting            'Orthorhombic' 
_symmetry_space_group_name_H-M    'Fdd2 '        
 
loop_ 
 _symmetry_equiv_pos_as_xyz 
 'x, y, z' 
 '-x, -y, z' 
 'x+1/4, -y+1/4, z+1/4' 
 '-x+1/4, y+1/4, z+1/4' 
 'x, y+1/2, z+1/2' 
 '-x, -y+1/2, z+1/2' 
 'x+1/4, -y+3/4, z+3/4' 
 '-x+1/4, y+3/4, z+3/4' 
 'x+1/2, y, z+1/2' 
 '-x+1/2, -y, z+1/2' 
 'x+3/4, -y+1/4, z+3/4' 
 '-x+3/4, y+1/4, z+3/4' 
 'x+1/2, y+1/2, z' 
 '-x+1/2, -y+1/2, z' 
 'x+3/4, -y+3/4, z+1/4' 
 '-x+3/4, y+3/4, z+1/4' 
 
_cell_length_a                    18.6008(11) 
_cell_length_b                    62.936(4) 
_cell_length_c                    7.5918(5) 
_cell_angle_alpha                 90.00 
_cell_angle_beta                  90.00 
_cell_angle_gamma                 90.00 
_cell_volume                      8887.4(10) 
_cell_formula_units_Z             16 
_cell_measurement_temperature     293(2) 
_cell_measurement_reflns_used     6281    
_cell_measurement_theta_min       3.0539  
_cell_measurement_theta_max       25.0264 
 
_exptl_crystal_description        'Prism'
_exptl_crystal_colour             'brown'
_exptl_crystal_size_max           0.75   
_exptl_crystal_size_mid           0.60   
_exptl_crystal_size_min           0.08   
_exptl_crystal_density_meas       ? 
_exptl_crystal_density_diffrn     1.667 
_exptl_crystal_density_method     'not measured' 
_exptl_crystal_F_000              4608 
_exptl_absorpt_coefficient_mu     1.183 
_exptl_absorpt_correction_type    'Multi-scan'                  
_exptl_absorpt_correction_T_min   0.6219                        
_exptl_absorpt_correction_T_max   1.0000                        
_exptl_absorpt_process_details    '(CrystalClear, Rigaku 2002)' 
 
_exptl_special_details 
; 
 ? 
; 
 
_diffrn_ambient_temperature       293(2) 
_diffrn_radiation_wavelength      0.71073 
_diffrn_radiation_type            MoK\a 
_diffrn_radiation_source          'rotating-anode generator' 
_diffrn_radiation_monochromator   graphite 
_diffrn_measurement_device_type   'Rigaku Mercury CCD'
_diffrn_measurement_method        \w                  
_diffrn_detector_area_resol_mean  ? 
_diffrn_standards_number          ? 
_diffrn_standards_interval_count  ? 
_diffrn_standards_interval_time   ? 
_diffrn_standards_decay_%         ? 
_diffrn_reflns_number             13661 
_diffrn_reflns_av_R_equivalents   0.0833 
_diffrn_reflns_av_sigmaI/netI     0.0797 
_diffrn_reflns_limit_h_min        -22 
_diffrn_reflns_limit_h_max        21 
_diffrn_reflns_limit_k_min        -73 
_diffrn_reflns_limit_k_max        74 
_diffrn_reflns_limit_l_min        -8 
_diffrn_reflns_limit_l_max        9 
_diffrn_reflns_theta_min          3.06 
_diffrn_reflns_theta_max          25.03 
_reflns_number_total              3792 
_reflns_number_gt                 3486 
_reflns_threshold_expression      >2sigma(I) 
 
_computing_data_collection        'CrystalClear (Rigaku Corp., 2002)'
_computing_cell_refinement        'CrystalClear (Rigaku Corp., 2002)'
_computing_data_reduction         'CrystalClear (Rigaku Corp., 2002)'
_computing_structure_solution     'Siemens SHELXTL^TM^ 5'  
_computing_structure_refinement   'Siemens SHELXTL^TM^ 5'  
_computing_molecular_graphics     'Siemens SHELXTL^TM^ 5'  
_computing_publication_material   'Siemens SHELXTL^TM^ 5'  
 
_refine_special_details 
; 
 Refinement of F^2^ against ALL reflections.  The weighted R-factor wR and 
 goodness of fit S are based on F^2^, conventional R-factors R are based 
 on F, with F set to zero for negative F^2^. The threshold expression of 
 F^2^ > 2sigma(F^2^) is used only for calculating R-factors(gt) etc. and is 
 not relevant to the choice of reflections for refinement.  R-factors based 
 on F^2^ are statistically about twice as large as those based on F, and R- 
 factors based on ALL data will be even larger. 
; 
 
_refine_ls_structure_factor_coef  Fsqd  
_refine_ls_matrix_type            full 
_refine_ls_weighting_scheme       calc  
_refine_ls_weighting_details 
 'calc w=1/[\s^2^(Fo^2^)+(0.0624P)^2^+13.4131P] where P=(Fo^2^+2Fc^2^)/3' 
_atom_sites_solution_primary      direct 
_atom_sites_solution_secondary    difmap 
_atom_sites_solution_hydrogens    geom 
_refine_ls_hydrogen_treatment     'noref'
_refine_ls_extinction_method      none 
_refine_ls_extinction_coef        ? 
_refine_ls_abs_structure_details 
 'Flack H D (1983), Acta Cryst. A39, 876-881' 
_refine_ls_abs_structure_Flack    0.028(18) 
_refine_ls_number_reflns          3792 
_refine_ls_number_parameters      316 
_refine_ls_number_restraints      1 
_refine_ls_R_factor_all           0.0509 
_refine_ls_R_factor_gt            0.0470 
_refine_ls_wR_factor_ref          0.1263 
_refine_ls_wR_factor_gt           0.1229 
_refine_ls_goodness_of_fit_ref    1.048 
_refine_ls_restrained_S_all       1.048 
_refine_ls_shift/su_max           0.002 
_refine_ls_shift/su_mean          0.000 
 
loop_ 
 _atom_site_label 
 _atom_site_type_symbol 
 _atom_site_fract_x 
 _atom_site_fract_y 
 _atom_site_fract_z 
 _atom_site_U_iso_or_equiv 
 _atom_site_adp_type 
 _atom_site_occupancy 
 _atom_site_symmetry_multiplicity 
 _atom_site_calc_flag 
 _atom_site_refinement_flags 
 _atom_site_disorder_assembly 
 _atom_site_disorder_group 
Zn1 Zn -0.098396(11) 0.234268(3) 0.43587(3) 0.01756(5) Uani 1 1 d . . . 
O4 O -0.28896(8) 0.50048(2) 0.50192(18) 0.0253(4) Uani 1 1 d . . . 
O3 O -0.23779(7) 0.47492(2) 0.34359(18) 0.0183(3) Uani 1 1 d . . . 
N4 N -0.20642(9) 0.30667(3) 0.1806(3) 0.0299(5) Uani 1 1 d . . . 
C1 C -0.15167(10) 0.25253(3) 0.7552(3) 0.0245(6) Uani 1 1 d . . . 
C17 C -0.26197(10) 0.48240(3) 0.4842(2) 0.0145(5) Uani 1 1 d . . . 
O11 O -0.17503(9) 0.32317(3) 0.1391(3) 0.0491(6) Uani 1 1 d . . . 
O2 O -0.13277(8) 0.25645(2) 0.5996(2) 0.0258(4) Uani 1 1 d . . . 
C4 C -0.21026(10) 0.30123(3) 0.7046(3) 0.0223(5) Uani 1 1 d . . . 
H4A H -0.2553 0.2948 0.7004 0.027 Uiso 1 1 calc R . . 
C14 C -0.16090(10) 0.44310(3) 0.6673(3) 0.0215(5) Uani 1 1 d . . . 
H14A H -0.1358 0.4529 0.7350 0.026 Uiso 1 1 calc R . . 
C3 C -0.15663(9) 0.29192(3) 0.7948(2) 0.0093(4) Uani 1 1 d . . . 
C13 C -0.22722(9) 0.44763(2) 0.6109(2) 0.0084(4) Uani 1 1 d . . . 
C6 C -0.07725(11) 0.31979(3) 0.7199(3) 0.0227(5) Uani 1 1 d . . . 
H6A H -0.0318 0.3259 0.7279 0.027 Uiso 1 1 calc R . . 
C7 C -0.09105(10) 0.30122(3) 0.8024(3) 0.0219(5) Uani 1 1 d . . . 
H7A H -0.0546 0.2946 0.8660 0.026 Uiso 1 1 calc R . . 
O10 O -0.17364(9) 0.29212(2) 0.2571(2) 0.0405(5) Uani 1 1 d . . . 
C9 C -0.15805(11) 0.36967(3) 0.5765(3) 0.0247(6) Uani 1 1 d . . . 
H9A H -0.1512 0.3724 0.7011 0.030 Uiso 1 1 calc R . . 
H9B H -0.2090 0.3676 0.5551 0.030 Uiso 1 1 calc R . . 
C11 C -0.23584(11) 0.41441(3) 0.4640(3) 0.0254(6) Uani 1 1 d . . . 
H11A H -0.2618 0.4049 0.3948 0.030 Uiso 1 1 calc R . . 
N1 N -0.13182(11) 0.33009(3) 0.6211(3) 0.0391(6) Uani 1 1 d . . . 
N2 N -0.16431(12) 0.40922(3) 0.5237(3) 0.0422(6) Uani 1 1 d . . . 
C12 C -0.26490(11) 0.43372(3) 0.5118(3) 0.0244(6) Uani 1 1 d . . . 
H12A H -0.3111 0.4372 0.4753 0.029 Uiso 1 1 calc R . . 
C5 C -0.19886(11) 0.32000(3) 0.6193(3) 0.0266(6) Uani 1 1 d . . . 
H5A H -0.2367 0.3263 0.5583 0.032 Uiso 1 1 calc R . . 
C2 C -0.16721(11) 0.27130(3) 0.8763(3) 0.0251(6) Uani 1 1 d . . . 
H2A H -0.2166 0.2703 0.9168 0.030 Uiso 1 1 calc R . . 
H2B H -0.1363 0.2703 0.9789 0.030 Uiso 1 1 calc R . . 
C15 C -0.12939(12) 0.42382(3) 0.6250(3) 0.0223(5) Uani 1 1 d . . . 
H15A H -0.0835 0.4208 0.6666 0.027 Uiso 1 1 calc R . . 
C10 C -0.13026(13) 0.38844(3) 0.4681(3) 0.0347(7) Uani 1 1 d . . . 
H10A H -0.0785 0.3895 0.4817 0.042 Uiso 1 1 calc R . . 
H10B H -0.1404 0.3859 0.3445 0.042 Uiso 1 1 calc R . . 
O9 O -0.27067(8) 0.30383(3) 0.1359(3) 0.0500(6) Uani 1 1 d . . . 
C16 C -0.26025(11) 0.46837(3) 0.6482(3) 0.0220(5) Uani 1 1 d . . . 
H16A H -0.2332 0.4755 0.7402 0.026 Uiso 1 1 calc R . . 
H16B H -0.3089 0.4662 0.6907 0.026 Uiso 1 1 calc R . . 
C8 C -0.11642(12) 0.34985(3) 0.5223(3) 0.0303(6) Uani 1 1 d . . . 
H8A H -0.1259 0.3472 0.3986 0.036 Uiso 1 1 calc R . . 
H8B H -0.0655 0.3529 0.5335 0.036 Uiso 1 1 calc R . . 
O7 O -0.07154(8) 0.20388(3) 0.2993(2) 0.0315(4) Uani 1 1 d . . . 
N3 N -0.11053(10) 0.19195(3) 0.3892(2) 0.0299(5) Uani 1 1 d . . . 
O2W O 0.16648(10) 0.36766(3) -0.2325(3) 0.0486(5) Uani 1 1 d . . . 
O1W O -0.22331(10) 0.36277(3) 0.0228(3) 0.0494(6) Uani 1 1 d . . . 
O1 O -0.15913(9) 0.23472(2) 0.8209(3) 0.0619(6) Uani 1 1 d . . . 
O6 O -0.14799(9) 0.20086(4) 0.5058(2) 0.0611(7) Uani 1 1 d . . . 
O3W O -0.18773(9) 0.23585(2) 0.2633(3) 0.0479(6) Uani 1 1 d . . . 
O8 O -0.10925(13) 0.17299(3) 0.3640(3) 0.1001(8) Uani 1 1 d . . . 
 
loop_ 
 _atom_site_aniso_label 
 _atom_site_aniso_U_11 
 _atom_site_aniso_U_22 
 _atom_site_aniso_U_33 
 _atom_site_aniso_U_23 
 _atom_site_aniso_U_13 
 _atom_site_aniso_U_12 
Zn1 0.01909(9) 0.01488(8) 0.01871(9) -0.00028(9) 0.00036(10) -0.00058(9) 
O4 0.0361(8) 0.0225(7) 0.0174(7) 0.0016(6) 0.0063(6) 0.0069(6) 
O3 0.0201(7) 0.0185(6) 0.0162(6) -0.0043(5) 0.0036(6) 0.0013(5) 
N4 0.0290(9) 0.0378(9) 0.0230(9) -0.0099(9) 0.0077(9) -0.0121(7) 
C1 0.0144(9) 0.0170(8) 0.0421(12) 0.0097(8) 0.0061(9) 0.0071(7) 
C17 0.0137(9) 0.0136(8) 0.0162(10) -0.0010(7) -0.0024(7) -0.0013(7) 
O11 0.0383(9) 0.0428(9) 0.0662(13) 0.0039(9) -0.0097(9) -0.0146(8) 
O2 0.0312(7) 0.0192(6) 0.0269(8) -0.0023(6) 0.0029(7) 0.0024(6) 
C4 0.0193(9) 0.0235(9) 0.0240(10) -0.0066(9) -0.0079(9) -0.0008(8) 
C14 0.0283(10) 0.0195(8) 0.0168(10) 0.0055(8) 0.0039(9) 0.0011(8) 
C3 0.0098(8) 0.0105(7) 0.0077(8) -0.0044(6) -0.0008(7) 0.0032(6) 
C13 0.0137(8) 0.0066(7) 0.0050(7) 0.0015(6) 0.0037(7) 0.0032(7) 
C6 0.0143(9) 0.0296(9) 0.0242(11) -0.0051(9) -0.0022(8) 0.0053(8) 
C7 0.0153(9) 0.0273(10) 0.0230(10) -0.0035(9) -0.0047(8) 0.0076(8) 
O10 0.0452(9) 0.0333(8) 0.0430(10) 0.0020(8) -0.0066(8) 0.0031(8) 
C9 0.0306(11) 0.0200(9) 0.0234(11) 0.0011(8) 0.0049(9) 0.0061(8) 
C11 0.0306(10) 0.0197(9) 0.0259(12) -0.0012(9) 0.0016(10) -0.0007(8) 
N1 0.0447(11) 0.0400(10) 0.0325(11) -0.0065(9) 0.0054(10) 0.0053(10) 
N2 0.0584(12) 0.0338(10) 0.0343(11) 0.0100(9) 0.0196(10) 0.0130(9) 
C12 0.0228(10) 0.0259(10) 0.0244(10) 0.0040(8) 0.0031(9) 0.0034(9) 
C5 0.0240(10) 0.0271(10) 0.0285(11) -0.0032(9) -0.0101(9) 0.0068(9) 
C2 0.0238(10) 0.0361(10) 0.0154(10) 0.0084(8) 0.0057(8) 0.0030(9) 
C15 0.0281(10) 0.0229(9) 0.0160(9) 0.0067(8) 0.0065(8) 0.0055(9) 
C10 0.0426(12) 0.0232(10) 0.0383(14) 0.0015(10) 0.0116(11) 0.0140(9) 
O9 0.0281(8) 0.0693(11) 0.0526(12) 0.0011(10) 0.0039(8) -0.0055(8) 
C16 0.0271(10) 0.0226(9) 0.0164(10) -0.0012(8) 0.0008(8) 0.0048(8) 
C8 0.0358(12) 0.0213(10) 0.0337(12) 0.0036(9) 0.0032(11) 0.0044(9) 
O7 0.0213(7) 0.0543(9) 0.0187(7) 0.0017(7) 0.0006(7) -0.0023(7) 
N3 0.0371(10) 0.0180(8) 0.0346(11) 0.0020(7) -0.0213(8) -0.0005(7) 
O2W 0.0637(11) 0.0345(8) 0.0476(10) 0.0020(8) 0.0183(9) 0.0057(8) 
O1W 0.0506(10) 0.0510(10) 0.0466(11) 0.0081(9) 0.0103(9) 0.0063(8) 
O1 0.0574(10) 0.0287(8) 0.0996(14) 0.0318(8) 0.0528(10) 0.0203(7) 
O6 0.0260(9) 0.1335(18) 0.0237(9) 0.0043(11) 0.0120(7) -0.0048(10) 
O3W 0.0321(8) 0.0265(7) 0.0853(13) -0.0027(8) -0.0334(9) 0.0101(6) 
O8 0.1534(16) 0.0153(8) 0.1316(16) 0.0088(9) -0.1128(12) -0.0043(10) 
 
_geom_special_details 
; 
 All esds (except the esd in the dihedral angle between two l.s. planes) 
 are estimated using the full covariance matrix.  The cell esds are taken 
 into account individually in the estimation of esds in distances, angles 
 and torsion angles; correlations between esds in cell parameters are only 
 used when they are defined by crystal symmetry.  An approximate (isotropic) 
 treatment of cell esds is used for estimating esds involving l.s. planes. 
; 
 
loop_ 
 _geom_bond_atom_site_label_1 
 _geom_bond_atom_site_label_2 
 _geom_bond_distance 
 _geom_bond_site_symmetry_2 
 _geom_bond_publ_flag 
Zn1 O2 1.9754(14) . ? 
Zn1 O4 2.0233(14) 7_554 ? 
Zn1 O3 2.0858(13) 16_445 ? 
Zn1 O3W 2.1184(19) . ? 
Zn1 O7 2.2317(16) . ? 
Zn1 O6 2.357(2) . ? 
O4 C17 1.251(2) . ? 
O4 Zn1 2.0233(14) 15_455 ? 
O3 C17 1.250(2) . ? 
O3 Zn1 2.0858(13) 12_454 ? 
N4 O11 1.232(2) . ? 
N4 O10 1.244(2) . ? 
N4 O9 1.255(2) . ? 
C1 O1 1.235(3) . ? 
C1 O2 1.257(3) . ? 
C1 C2 1.524(3) . ? 
C17 C16 1.527(3) . ? 
C4 C3 1.344(3) . ? 
C4 C5 1.364(3) . ? 
C4 H4A 0.9300 . ? 
C14 C13 1.336(3) . ? 
C14 C15 1.385(3) . ? 
C14 H14A 0.9300 . ? 
C3 C7 1.354(3) . ? 
C3 C2 1.451(3) . ? 
C13 C12 1.351(3) . ? 
C13 C16 1.470(2) . ? 
C6 C7 1.350(3) . ? 
C6 N1 1.419(3) . ? 
C6 H6A 0.9300 . ? 
C7 H7A 0.9300 . ? 
C9 C8 1.524(3) . ? 
C9 C10 1.530(3) . ? 
C9 H9A 0.9700 . ? 
C9 H9B 0.9700 . ? 
C11 C12 1.379(3) . ? 
C11 N2 1.443(3) . ? 
C11 H11A 0.9300 . ? 
N1 C5 1.399(3) . ? 
N1 C8 1.481(3) . ? 
N2 C15 1.363(3) . ? 
N2 C10 1.513(3) . ? 
C12 H12A 0.9300 . ? 
C5 H5A 0.9300 . ? 
C2 H2A 0.9700 . ? 
C2 H2B 0.9700 . ? 
C15 H15A 0.9300 . ? 
C10 H10A 0.9700 . ? 
C10 H10B 0.9700 . ? 
C16 H16A 0.9700 . ? 
C16 H16B 0.9700 . ? 
C8 H8A 0.9700 . ? 
C8 H8B 0.9700 . ? 
O7 N3 1.247(2) . ? 
N3 O8 1.208(2) . ? 
N3 O6 1.258(3) . ? 
 
loop_ 
 _geom_angle_atom_site_label_1 
 _geom_angle_atom_site_label_2 
 _geom_angle_atom_site_label_3 
 _geom_angle 
 _geom_angle_site_symmetry_1 
 _geom_angle_site_symmetry_3 
 _geom_angle_publ_flag 
O2 Zn1 O4 106.02(6) . 7_554 ? 
O2 Zn1 O3 94.99(6) . 16_445 ? 
O4 Zn1 O3 96.32(6) 7_554 16_445 ? 
O2 Zn1 O3W 95.86(7) . . ? 
O4 Zn1 O3W 88.82(7) 7_554 . ? 
O3 Zn1 O3W 166.23(5) 16_445 . ? 
O2 Zn1 O7 165.96(6) . . ? 
O4 Zn1 O7 87.92(5) 7_554 . ? 
O3 Zn1 O7 81.54(5) 16_445 . ? 
O3W Zn1 O7 85.91(6) . . ? 
O2 Zn1 O6 111.22(6) . . ? 
O4 Zn1 O6 142.44(6) 7_554 . ? 
O3 Zn1 O6 85.40(6) 16_445 . ? 
O3W Zn1 O6 82.78(6) . . ? 
O7 Zn1 O6 55.09(6) . . ? 
C17 O4 Zn1 136.47(13) . 15_455 ? 
C17 O3 Zn1 131.33(12) . 12_454 ? 
O11 N4 O10 120.49(18) . . ? 
O11 N4 O9 120.13(19) . . ? 
O10 N4 O9 119.22(18) . . ? 
O1 C1 O2 126.1(2) . . ? 
O1 C1 C2 116.0(2) . . ? 
O2 C1 C2 117.89(17) . . ? 
O3 C17 O4 125.35(17) . . ? 
O3 C17 C16 118.11(15) . . ? 
O4 C17 C16 116.53(16) . . ? 
C1 O2 Zn1 122.91(12) . . ? 
C3 C4 C5 120.27(18) . . ? 
C3 C4 H4A 119.9 . . ? 
C5 C4 H4A 119.9 . . ? 
C13 C14 C15 120.21(18) . . ? 
C13 C14 H14A 119.9 . . ? 
C15 C14 H14A 119.9 . . ? 
C4 C3 C7 120.11(17) . . ? 
C4 C3 C2 120.42(17) . . ? 
C7 C3 C2 119.38(17) . . ? 
C14 C13 C12 121.28(17) . . ? 
C14 C13 C16 120.89(16) . . ? 
C12 C13 C16 117.77(17) . . ? 
C7 C6 N1 120.29(18) . . ? 
C7 C6 H6A 119.9 . . ? 
N1 C6 H6A 119.9 . . ? 
C6 C7 C3 121.71(18) . . ? 
C6 C7 H7A 119.1 . . ? 
C3 C7 H7A 119.1 . . ? 
C8 C9 C10 108.34(17) . . ? 
C8 C9 H9A 110.0 . . ? 
C10 C9 H9A 110.0 . . ? 
C8 C9 H9B 110.0 . . ? 
C10 C9 H9B 110.0 . . ? 
H9A C9 H9B 108.4 . . ? 
C12 C11 N2 118.59(18) . . ? 
C12 C11 H11A 120.7 . . ? 
N2 C11 H11A 120.7 . . ? 
C5 N1 C6 115.83(18) . . ? 
C5 N1 C8 123.25(19) . . ? 
C6 N1 C8 120.89(19) . . ? 
C15 N2 C11 117.65(18) . . ? 
C15 N2 C10 122.7(2) . . ? 
C11 N2 C10 119.61(19) . . ? 
C13 C12 C11 120.96(19) . . ? 
C13 C12 H12A 119.5 . . ? 
C11 C12 H12A 119.5 . . ? 
C4 C5 N1 121.78(19) . . ? 
C4 C5 H5A 119.1 . . ? 
N1 C5 H5A 119.1 . . ? 
C3 C2 C1 114.22(17) . . ? 
C3 C2 H2A 108.7 . . ? 
C1 C2 H2A 108.7 . . ? 
C3 C2 H2B 108.7 . . ? 
C1 C2 H2B 108.7 . . ? 
H2A C2 H2B 107.6 . . ? 
N2 C15 C14 121.3(2) . . ? 
N2 C15 H15A 119.3 . . ? 
C14 C15 H15A 119.3 . . ? 
N2 C10 C9 112.09(19) . . ? 
N2 C10 H10A 109.2 . . ? 
C9 C10 H10A 109.2 . . ? 
N2 C10 H10B 109.2 . . ? 
C9 C10 H10B 109.2 . . ? 
H10A C10 H10B 107.9 . . ? 
C13 C16 C17 111.41(16) . . ? 
C13 C16 H16A 109.3 . . ? 
C17 C16 H16A 109.3 . . ? 
C13 C16 H16B 109.3 . . ? 
C17 C16 H16B 109.3 . . ? 
H16A C16 H16B 108.0 . . ? 
N1 C8 C9 116.88(19) . . ? 
N1 C8 H8A 108.1 . . ? 
C9 C8 H8A 108.1 . . ? 
N1 C8 H8B 108.1 . . ? 
C9 C8 H8B 108.1 . . ? 
H8A C8 H8B 107.3 . . ? 
N3 O7 Zn1 97.57(12) . . ? 
O8 N3 O7 119.8(2) . . ? 
O8 N3 O6 124.2(2) . . ? 
O7 N3 O6 115.99(18) . . ? 
N3 O6 Zn1 91.29(13) . . ? 

_diffrn_measured_fraction_theta_max    0.997 
_diffrn_reflns_theta_full              25.03 
_diffrn_measured_fraction_theta_full   0.997 
_refine_diff_density_max    0.601 
_refine_diff_density_min   -0.419 
_refine_diff_density_rms    0.090 
